# Supplementary material
Source: publisher figshare collection journal article supplement (https://acs.figshare.com/ndownloader/files/4763452)
Supplement: Supplementary file 1 [file 4763452]

**Supporting Information**

“Geometric Accuracy of Three-Dimensional Molecular Overlays.”

Qi Chen*, Richard E. Higgs, Michal Vieth

**Table of Contents**

**Table S1**. Basic information of the data sets.

**Table S2**. Number of correct overlays obtained from different templates and different methods.

**Table S3**. Overlay accuracy (corr%) of 1ogu with various conformations as templates.

**Table S4**. ROCS-flexible overlay accuracy (corr%) of several CDK2 compounds using different conformations as templates.

***Table S1****. Basic information of the data sets.*a

| protein | CDK2 | HIV | ESR1 | p38 | thermolysin | rhinovirus | elastase | trypsin |
| --- | --- | --- | --- | --- | --- | --- | --- | --- |
| total # | 57 | 28 | 13 | 13 | 12 | 8 | 7 | 7 |
| #rotB | 0-10 | 8-30 | 0-8 | 0-6 | 3-14 | 8-11 | 5-12 | 1-8 |
| Ave#rotB | 4.1 | 16.0 | 3.9 | 3.5 | 8.3 | 9.4 | 8.4 | 2.9 |
| #atom | 8-36 | 23-61 | 17-34 | 8-37 | 10-37 | 23-27 | 23-36 | 9-30 |
| Ave#atom | 23.7 | 47.3 | 26.3 | 25.5 | 23.8 | 25.3 | 30.1 | 12.6 |
| AveSimDY | 0.14-0.36 | 0.26-0.50 | 0.22-0.37 | 0.17-0.34 | 0.28-0.5 | 0.92-0.96 | 0.3-0.66 | 0.34-0.68 |
| (0.27) | (0.40) | (0.31) | (0.28) | (0.42) | (0.94) | (0.55) | (0.58) |
| AveSimNA | 0.37-0.81 | 0.51-0.85 | 0.69-0.81 | 0.37-0.76 | 0.49-0.75 | 0.91-0.95 | 0.78-0.89 | 0.42-0.85 |
| (0.75) | (0.81) | (0.78) | (0.69) | (0.68) | (0.94) | (0.86) | (0.78) |
| AveNAratio | 0.66-2.96 | 0.78-2.06 | 0.77-1.55 | 0.69-3.19 | 0.64-2.38 | 0.93-1.1 | 0.84-1.31 | 0.42-1.4 |
| (1.09) | (1.05) | (1.06) | (1.19) | (1.17) | (1.00) | (1.02) | (1.18) |

*a* the values in the parentheses are the corresponding average values.

***Table S2****. Number of correct overlays obtained from different templates and different methods.a*

| target | template | ROCS-r | ROCS-f | FlexS-r | FlexS-f |
| --- | --- | --- | --- | --- | --- |
| CDK2 | 1aq1 | 7 | 4 | 13 | 6 |
| CDK2 | 1ckp | 20 | 10 | 6 | 2 |
| CDK2 | 1di8 | 2 | 1 | 2 | 2 |
| CDK2 | 1dm2 | 5 | 4 | 3 | 3 |
| CDK2 | 1e1v | 10 | 9 | 10 | 9 |
| CDK2 | 1e1x | 9 | 6 | 8 | 6 |
| CDK2 | 1e9h | 11 | 10 | 9 | 9 |
| CDK2 | 1fvv | 26 | 10 | 19 | 10 |
| CDK2 | 1g5s | 15 | 2 | 15 | 6 |
| CDK2 | 1gih | 20 | 16 | 18 | 13 |
| CDK2 | 1gij | 23 | 15 | 8 | 6 |
| CDK2 | 1gz8 | 15 | 9 | 9 | 8 |
| CDK2 | 1h00 | 18 | 12 | 22 | 16 |
| CDK2 | 1h01 | 11 | 14 | 20 | 24 |
| CDK2 | 1h06 | 21 | 19 | 21 | 12 |
| CDK2 | 1h07 | 11 | 11 | 21 | 20 |
| CDK2 | 1h08 | 14 | 16 | 17 | 24 |
| CDK2 | 1h0u | 11 | 8 | 8 | 9 |
| CDK2 | 1h0v | 12 | 7 | 9 | 7 |
| CDK2 | 1h0w | 9 | 7 | 9 | 6 |
| CDK2 | 1h1q | 29 | 17 | 25 | 22 |
| CDK2 | 1h1r | 30 | 21 | 22 | 18 |
| CDK2 | 1h1s | 29 | 20 | 23 | 22 |
| CDK2 | 1jsv | 20 | 7 | 10 | 8 |
| CDK2 | 1ke5 | 26 | 9 | 16 | 9 |
| CDK2 | 1ke6 | 27 | 18 | 24 | 17 |
| CDK2 | 1ke7 | 30 | 20 | 22 | 14 |
| CDK2 | 1ke8 | 17 | 9 | 16 | 12 |
| CDK2 | 1ke9 | 21 | 11 | 11 | 11 |
| CDK2 | 1ogu | 30 | 23 | 27 | 26 |
| CDK2 | 1oi9 | 36 | 23 | 24 | 22 |
| CDK2 | 1oiq | 13 | 15 | 15 | 12 |
| CDK2 | 1oir | 19 | 13 | 16 | 21 |
| CDK2 | 1oit | 27 | 17 | 23 | 22 |
| CDK2 | 1oiu | 24 | 16 | 20 | 16 |
| CDK2 | 1oiy | 32 | 25 | 21 | 22 |
| CDK2 | 1p2a | 22 | 8 | 10 | 3 |
| CDK2 | 1p5e | 1 | 1 | 1 | 1 |
| CDK2 | 1pf8 | 10 | 7 | 9 | 7 |
| CDK2 | 1pkd | 7 | 3 | 14 | 7 |
| CDK2 | 1pxi | 3 | 2 | 3 | 2 |
| CDK2 | 1pxj | 3 | 2 | 4 | 2 |
| CDK2 | 1pxk | 16 | 14 | 9 | 11 |
| CDK2 | 1pxl | 33 | 21 | 24 | 23 |
| CDK2 | 1pxm | 26 | 20 | 23 | 23 |
| CDK2 | 1pxn | 24 | 20 | 25 | 23 |
| CDK2 | 1pxo | 8 | 4 | 7 | 3 |
| CDK2 | 1pxp | 29 | 20 | 27 | 24 |
| CDK2 | 1r78 | 10 | 13 | 15 | 8 |
| CDK2 | 1urw | 23 | 11 | 21 | 13 |
| CDK2 | 1vyw | 4 | 5 | 6 | 3 |
| CDK2 | 1vyz | 19 | 7 | 10 | 7 |
| CDK2 | 1w0x | 10 | 4 | 6 | 3 |
| CDK2 | 1wcc | 3 | 1 | 1 | 1 |
| CDK2 | 1y91 | 15 | 12 | 14 | 15 |
| CDK2 | 2bhe | 21 | 11 | 17 | 10 |
| CDK2 | 2bhh | 12 | 16 | 20 | 18 |
| elastase | 1ela | 3 | 2 | 3 | 3 |
| elastase | 1elb | 1 | 1 | 2 | 1 |
| elastase | 1elc | 1 | 0 | 0 | 1 |
| elastase | 1eld | 3 | 3 | 3 | 3 |
| elastase | 1ele | 3 | 2 | 4 | 3 |
| elastase | t0035 | 2 | 1 | 2 | 1 |
| elastase | t0036 | 2 | 1 | 1 | 1 |
| ESR1 | 1a52 | 6 | 6 | 5 | 5 |
| ESR1 | 1gwq | 6 | 5 | 2 | 5 |
| ESR1 | 1l2i | 6 | 6 | 6 | 4 |
| ESR1 | 1r5k | 3 | 3 | 8 | 4 |
| ESR1 | 1sj0 | 6 | 1 | 5 | 2 |
| ESR1 | 1uom | 6 | 3 | 11 | 5 |
| ESR1 | 1x7e | 6 | 5 | 3 | 5 |
| ESR1 | 1x7r | 6 | 5 | 5 | 5 |
| ESR1 | 1xp1 | 6 | 1 | 5 | 1 |
| ESR1 | 1xp9 | 6 | 1 | 6 | 0 |
| ESR1 | 1xqc | 7 | 3 | 10 | 4 |
| ESR1 | 2bj4 | 7 | 2 | 11 | 5 |
| ESR1 | 2erd | 3 | 2 | 3 | 2 |
| HIV | 1aaq | 19 | 5 | 2 | 1 |
| HIV | 1ajv | 10 | 1 | 4 | 0 |
| HIV | 1ajx | 6 | 1 | 4 | 0 |
| HIV | 1bve | 13 | 1 | 2 | 0 |
| HIV | 1cpi | 16 | 4 | 11 | 2 |
| HIV | 1dif | 17 | 0 | 15 | 6 |
| HIV | 1gnm | 4 | 1 | 2 | 2 |
| HIV | 1hos | 14 | 0 | 11 | 1 |
| HIV | 1hpv | 11 | 2 | 2 | 1 |
| HIV | 1hpx | 4 | 2 | 9 | 2 |
| HIV | 1hsg | 13 | 2 | 7 | 1 |
| HIV | 1htf | 1 | 1 | 1 | 0 |
| HIV | 1htg | 7 | 1 | 5 | 1 |
| HIV | 1hvc | 15 | 1 | 13 | 5 |
| HIV | 1hvi | 14 | 1 | 14 | 5 |
| HIV | 1hvj | 16 | 2 | 7 | 7 |
| HIV | 1hvl | 18 | 1 | 12 | 5 |
| HIV | 1hvs | 14 | 1 | 14 | 5 |
| HIV | 1hxb | 6 | 1 | 9 | 2 |
| HIV | 1mtr | 12 | 6 | 10 | 3 |
| HIV | 1odx | 10 | 2 | 2 | 3 |
| HIV | 1pro | 12 | 2 | 8 | 1 |
| HIV | 1ytg | 2 | 1 | 0 | 1 |
| HIV | 1yth | 1 | 1 | 1 | 1 |
| HIV | 2upj | 10 | 0 | 2 | 1 |
| HIV | 4hvp | 13 | 1 | 8 | 2 |
| HIV | 7hvp | 15 | 3 | 5 | 4 |
| HIV | 9hvp | 12 | 1 | 10 | 3 |
| p38 | 1a9u | 3 | 3 | 4 | 4 |
| p38 | 1bl6 | 7 | 5 | 3 | 3 |
| p38 | 1bl7 | 3 | 2 | 4 | 5 |
| p38 | 1di9 | 2 | 2 | 1 | 1 |
| p38 | 1m7q | 4 | 3 | 4 | 4 |
| p38 | 1ouk | 4 | 4 | 6 | 3 |
| p38 | 1ouy | 3 | 4 | 5 | 4 |
| p38 | 1ove | 4 | 3 | 4 | 3 |
| p38 | 1oz1 | 4 | 3 | 4 | 5 |
| p38 | 1w7h | 2 | 2 | 2 | 2 |
| p38 | 1w84 | 3 | 3 | 4 | 3 |
| p38 | 1wbo | 1 | 1 | 1 | 0 |
| p38 | 1yqj | 5 | 2 | 4 | 3 |
| rhinovirus | 2r04 | 4 | 4 | 4 | 4 |
| rhinovirus | 2r06 | 4 | 4 | 4 | 4 |
| rhinovirus | 2r07 | 4 | 4 | 4 | 4 |
| rhinovirus | 2rm2 | 4 | 4 | 4 | 4 |
| rhinovirus | 2rr1 | 4 | 4 | 4 | 4 |
| rhinovirus | 2rs1 | 4 | 4 | 4 | 4 |
| rhinovirus | 2rs3 | 4 | 4 | 5 | 4 |
| rhinovirus | 2rs5 | 4 | 4 | 4 | 4 |
| thermolysin | 1tlp | 3 | 1 | 4 | 5 |
| thermolysin | 1tmn | 3 | 0 | 6 | 4 |
| thermolysin | 2tmn | 1 | 1 | 3 | 1 |
| thermolysin | 3tmn | 4 | 1 | 3 | 1 |
| thermolysin | 4tln | 1 | 2 | 2 | 1 |
| thermolysin | 4tmn | 2 | 0 | 6 | 3 |
| thermolysin | 5tln | 4 | 2 | 3 | 3 |
| thermolysin | 5tmn | 2 | 0 | 5 | 4 |
| thermolysin | cbz | 1 | 1 | 2 | 1 |
| thermolysin | ppp | 1 | 1 | 3 | 1 |
| thermolysin | rthior | 2 | 2 | 3 | 2 |
| thermolysin | thior | 3 | 3 | 3 | 2 |
| trypsin | 1pph | 1 | 1 | 5 | 3 |
| trypsin | 1tnh | 5 | 5 | 5 | 5 |
| trypsin | 1tni | 1 | 1 | 4 | 0 |
| trypsin | 1tnj | 6 | 5 | 6 | 0 |
| trypsin | 1tnk | 5 | 5 | 6 | 0 |
| trypsin | 1tnl | 5 | 5 | 5 | 0 |
| trypsin | 3ptb | 5 | 5 | 5 | 6 |

*a* ROCS-r = ROCS-rigid, ROCS-f = ROCS-flexible, FlexS-r = FlexS-rigid, FlexS-f = FlexS-flexible.

**Table S3**. Overlay accuracy (corr%) of 1ogu with various conformations as templates. *a*

| RMSD | FlexS-f | ROCS-f |
| --- | --- | --- |
| 0 | 46% | 40% |
| 0.58 | 42% | 39% |
| 1.03 | 39% | 35% |
| 1.5 | 25% | 30% |
| 2.05 | 7% | 9% |
| 2.47 | 2% | 7% |
| 2.65 | 2% | 2% |
| 2.78 | 2% | 2% |

*a* RMSD to X-ray conformation in Å, FlexS-f = FlexS-flexible, ROCS-f=ROCS-flexible.

**Table S4**. ROCS-flexible overlay accuracy (corr%) of several CDK2 compounds using different conformations as templates.

| template | X-ray | CORINA | |  | OMEGA-E0*a* | |
| --- | --- | --- | --- | --- | --- | --- |
|  | corr% | RMSD (Å) | corr% |  | RMSD (Å) | corr% |
| 1oi9 | 40% | 1.01 | 35% |  | 2.5 | 2% |
| 1oiy | 44% | 1.04 | 35% |  | 0.74 | 37% |
| 1oiu | 28% | 1.3 | 30% |  | 2.26 | 4% |
| 1h1q | 30% | 1.94 | 4% |  | 0.52 | 25% |
| 1h1r | 37% | 2.4 | 5% |  | 0.93 | 37% |
| 1pxm | 35% | 2.51 | 0% |  | 2.53 | 5% |
| 1h08 | 28% | 2.56 | 0% |  | 2.48 | 2% |
| 1pxl | 37% | 2.57 | 5% |  | 2.27 | 0% |
| 1ogu | 40% | 2.65 | 2% |  | 2.47 | 7% |
| 1pxp | 35% | 2.65 | 0% |  | 2.36 | 9% |
| 1pxn | 35% | 2.8 | 2% |  | 2.58 | 4% |
| 1h1s | 35% | 2.8 | 5% |  | 2.75 | 2% |

*a* The lowest energy conformation of OMEGA conformations.
